# Supplementary material
Source: PubMed Central journal article supplement (PMC3230704)
Supplement: NIHMS334483-supplement-supplement_1.pdf [file NIHMS334483-supplement-supplement_1.pdf]

# Supporting Information

## *In vivo* Optical Imaging of Membrane-Type Matrix Metalloproteinase (MT-MMP) Activity

Lei Zhu,<sup>†,‡</sup> Fan Zhang,<sup>†</sup> Ying Ma,<sup>†</sup> Gang Liu,<sup>†</sup> Kwangmeyung Kim,<sup>§</sup> Xuexun Fang,<sup>‡</sup> Seulki Lee,<sup>\*,†</sup> and Xiaoyuan Chen<sup>\*,†</sup>

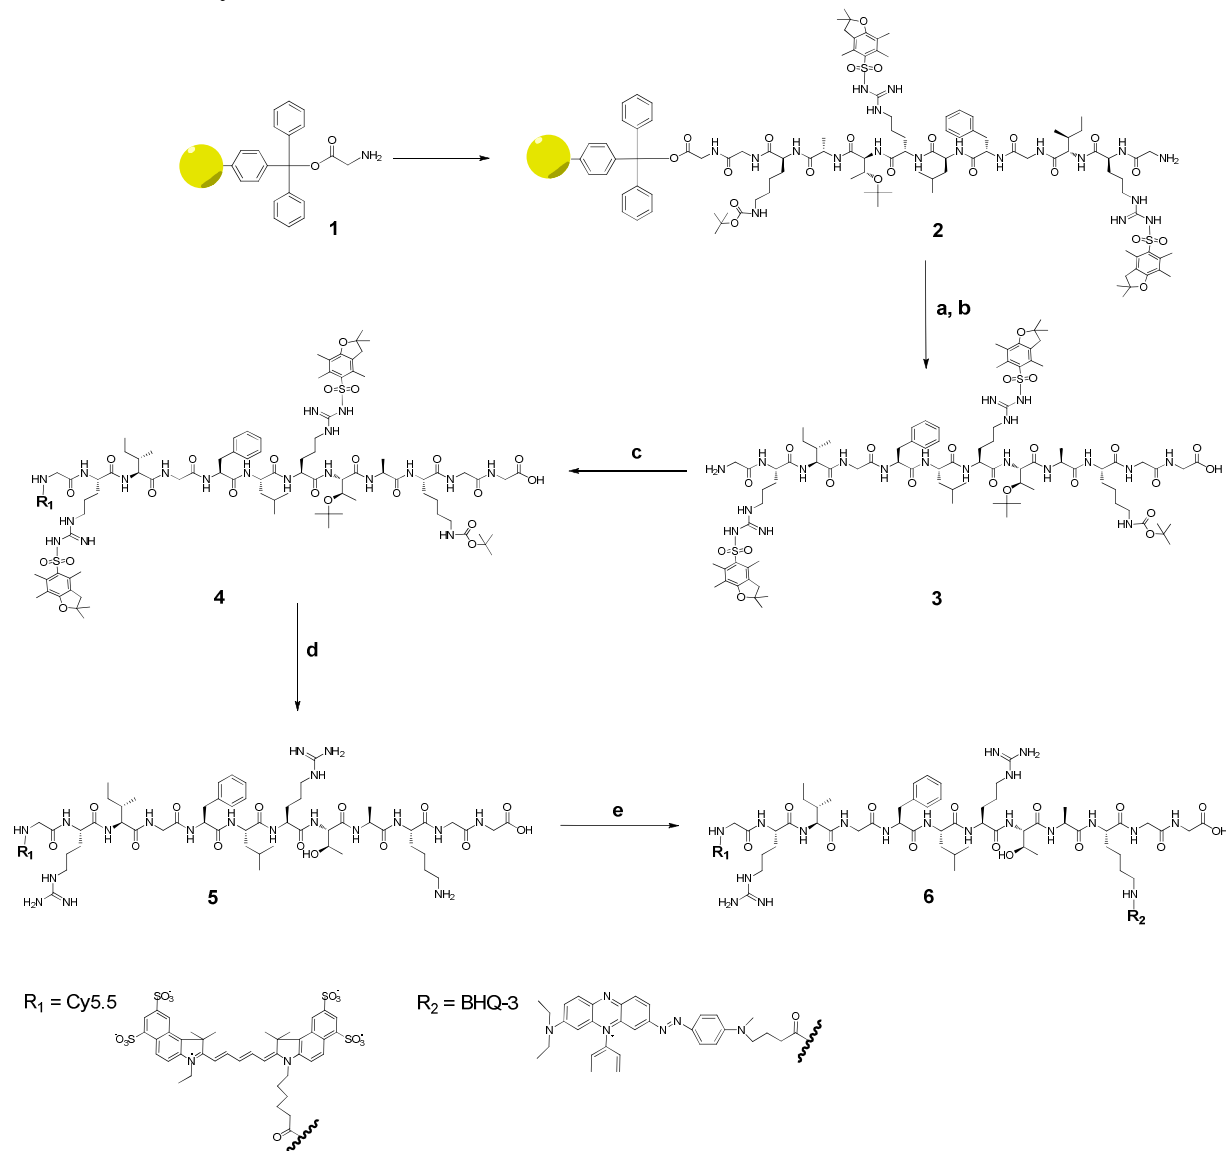

**Scheme S1.** Synthesis of **6**, MT-P. a) 1% TFA in dichloromethane; b) 20% piperidine; c) Cy5.5-NHS ester in DMF containing 2% DIPEA; d) TFA/water/triisopropylsilane/1,2-ethanedithiol (92.5/2.5/2.5/2.5, v/v/v/v); e) BHQ-3 NHS ester in DMF containing 2% DIPEA
